# Supplementary material
Source: PubMed Central journal article supplement (PMC2973918)
Supplement: 1003609107_pnas.1003609107_SI.pdf [file 1003609107_pnas.1003609107_SI.pdf]

# Supporting Information

## Chowdhury and Chanda 10.1073/pnas.1003609107

### SI Text

**I. Simplification of the Coupled Equilibrium Constant at Very Low Voltage.** We consider the four different macrostates which contribute to  $P_{11}$ . Taking the ratios of the Boltzmann weights of the macrostates (1,1,1), (1,1,0), and (1,0,1) to  $z(1,0,0)$ , we get:

$$\frac{z(1,1,0)}{z(1,0,0)} = K_2 \quad \text{[S1.1]}$$

$$\frac{z(1,0,1)}{z(1,0,0)} = K_3 \quad \text{[S1.2]}$$

$$\frac{z(1,1,1)}{z(1,0,0)} = K_2 K_3 \theta_{23} \quad \text{[S1.3]}$$

Both  $K_2$  and  $K_3$  are small at low voltages (Eq. 1) and, therefore, the ratios defined in the above equations will become negligible. In other words, the magnitude of the  $z(1,0,0)$  term will be much larger than  $z(1,0,1)$ ,  $z(1,1,0)$ , and  $z(1,1,1)$ .

The coupled equilibrium constant for 1st particle would be expressed as:

$$\varepsilon_1 = \frac{(K_1 K_2 K_3 \theta_{12} \theta_{23} \theta_{13} + K_1 K_2 \theta_{12} + K_1 + K_1 [K_3 \theta_{13}])}{(1 + K_3 + K_2 + K_2 K_3 \theta_{23})} \quad \text{[S2]}$$

Each of the apparent intrinsic equilibrium constants is an exponential function of voltage. Thus  $\ln \varepsilon_1$  would be a highly nonlinear function of voltage. However, using the simplification described in Eqs. S1.1, S1.2, and S1.3, the expression for  $\varepsilon_1$  at very low voltages would be greatly simplified (Eqs. 9.1 and 9.2).

**II. Definition of Particle.** For the purposes of our discussion, we use the word “particle” to signify a specific structural unit of a protein. A protein is considered to be an ensemble of interlinked particles. When a site-specific probe is used to monitor the dynamics of a specific structural unit, the remaining structural units are considered to be a subspace of the entire ensemble.  $\chi^{\text{diff}}$  for this specific structural unit reports its net interaction with the entire subspace. For example, in case of the voltage-gated sodium channels, when the activation of a specific voltage-sensor is monitored (say using a fluorescent probe), the remaining structural units (i.e., all the other voltage-sensors and the pore domain) constitute the subspace. In a recent study on BK channels, fluorescent probes were used to monitor the activation of S2 and S4 segments of the voltage-sensing domain separately (1). When monitoring S2, the rest of the protein forms the subspace. Thus the definition of particle largely depends on the choice of the site-specific probe and the knowledge about the conformational transition that the probe is reporting.

**III. Solution for an  $\mathcal{N}$ -Particle Ensemble.** We consider an  $\mathcal{N}$ -particle system, in which each of the particles undergoes a voltage-dependent transition from its resting to activated microstate, and each particle interacts with every other the particle of the system through four state-dependent interactions as described for the three particle system. For any particle ‘ $i$ ’ in this system, we define the particle matrix,  $\tilde{S}_i$ , which is a  $1 \times 2$  vector, with the intrinsic chemical factors as its elements,

$$\tilde{S}_i = [\omega_{i0} \quad \omega_{i1}] \quad \text{[S3]}$$

where the intrinsic chemical factor of ‘ $i$ ’ in a specific conformation ‘ $s$ ’ is:

$$\omega_{is} = e^{-G_{is}\beta} \quad \text{[S4]}$$

The system can exist in  $2^n$  possible macrostates and therefore, we can write a  $1 \times 2^n$  vector where each element represents the intrinsic chemical factor of a macrostate of this system. This system matrix,  $\tilde{A}$ , can be defined as:

$$\tilde{A} = \otimes_{i=1}^n \tilde{S}_i \quad \text{[S5]}$$

where  $\otimes$  indicates the Kronecker\* product of all the particle matrices. The elements of the system matrix  $\tilde{A}$  do not include the contributions of the interaction energies between the particles. To incorporate the coupling interaction terms, we define another  $1 \times 2^n$  coupling vector,  $\tilde{C}$ , where each element indicates the stabilization conferred to an individual macrostate of the system by the pairwise interactions.

To denote every macrostate of this  $\mathcal{N}$ -particle system we use an  $\mathcal{N}$ -tuple variable  $\nu_k(x_1^k, x_2^k, x_3^k, \dots, x_{n-1}^k, x_n^k)$ . The components of  $\nu_k$  are  $x_i^k$ , ( $i = 1, 2, \dots, n$ ), which indicate the microstate of the  $i$ th particle in the  $k$ th macrostate of the system ( $k = 1, 2, \dots, 2^n$ ).  $x_i^k$  is 1 or 0 ( $\forall i, k$ ) and indicates whether the  $i$ th particle is in the activated or resting conformation. The  $k$ th element of  $\tilde{A}$  corresponds to the macrostate  $\nu_k$  and can be expressed as:

$$\Lambda_k = \prod_{i=1}^n \omega_{ix_i^k} \quad \text{[S6]}$$

The net coupling factor for the  $\mathcal{N}$ -particle system in the  $k$ th macrostate will be:

$$C_k = \prod_{i=1}^n \prod_{j=1, j \neq i}^n \theta_{i_0 j_0}^{(1-x_i^k)(1-x_j^k)} \theta_{i_1 j_1}^{x_i^k x_j^k} \theta_{i_0 j_1}^{(1-x_i^k)x_j^k} \theta_{i_1 j_0}^{x_i^k(1-x_j^k)} \quad \text{[S7]}$$

$\Lambda_k$  and  $C_k$  are the  $k$ th elements in the system matrix,  $\tilde{A}$  and the coupling matrix,  $\tilde{C}$  respectively. Thus, the Boltzmann weight of the  $k$ th macrostate,  $\nu_k$ , becomes:

$$z(\nu_k) = \Lambda_k C_k \quad \text{[S8]}$$

The Boltzmann weights of all the macrostates of the system can be collectively represented in the form of a  $1 \times 2^n$  matrix,  $\tilde{\zeta}$ , whose  $k$ th element is  $z(\nu_k)$ :

$$\tilde{\zeta} = [z(\nu_1)z(\nu_2)z(\nu_3)\dots z(\nu_{2^n-1})z(\nu_{2^n})] = [\tilde{A} \cdot \tilde{C}] \quad \text{[S9]}$$

where  $\cdot$  indicates the Hadamard<sup>†</sup> product of the two matrices.

The canonical partition function for the entire system is:

$$\hat{Z} = \sum_k z(\nu_k) = \tilde{A} \cdot \tilde{C}^T \quad \text{[S10]}$$

The probability of the  $i$ th particle being in the activated conformation as:

\*Consider matrices  $\tilde{A} = (a_{ij})$  of order  $m \times n$  and  $\tilde{B} = (b_{ki})$  of order  $p \times q$ . The Kronecker product of the two matrices is given by  $\tilde{A} \otimes \tilde{B} = (a_{ij} b_{kl})$  where  $a_{ij} b_{kl}$  is of the order of  $p \times q$  and  $\tilde{A} \otimes \tilde{B}$  is of the order of  $mp \times nq$  (2).

†Consider matrices  $\tilde{A} = (a_{ij})$  and  $\tilde{B} = (b_{ij})$  of order  $p \times q$ . The Hadamard product of the two matrices is given by  $[\tilde{A} \cdot \tilde{B}] = (a_{ij} b_{ij})$  where  $a_{ij} b_{ij}$  is a scalar and  $[\tilde{A} \cdot \tilde{B}]$  is of the order of  $p \times q$  (2).

$$P_{i1} = \frac{\sum_k x_i^k z(\nu_k)}{\hat{Z}} \quad [\text{S11}]$$

And the probability of the  $i$ th particle being in the resting conformation can be expressed as:

$$P_{i0} = \frac{\sum_k (1 - x_i^k) z(\nu_k)}{\hat{Z}} \quad [\text{S12}]$$

At extreme potentials these probability terms would also be dominated by a single macrostate of the system—at low voltages the macrostate where  $i$  is activated and all others are resting would dominate  $P_{i1}$ , and the macrostate where all particles are resting would dominate  $P_{i0}$ . At high voltages  $P_{i1}$  would be dominated by the macrostate where all particles are activated, while  $P_{i0}$  would be dominated by the macrostate where only  $i$  is resting and all the others are activated. With these approximations the  $\chi$  parameters for  $i$  in an  $\mathcal{N}$ -particle system can be easily derived in the explicit or normalized forms.

#### IV. General Expression for the $\chi$ Values. At extreme voltages:

$$\ln \varepsilon = qF\beta V + \chi \quad [\text{S13}]$$

$qF\beta$  is the slope of the  $\ln \varepsilon$  vs  $V$  plot at extreme voltages. Thus Eq. S13, may be rewritten as:

$$\ln \varepsilon = \left( \frac{\partial \ln \varepsilon}{\partial V} \right) V + \chi \quad [\text{S14}]$$

Eq. S14 can be converted into an exact differential as:

$$-\frac{\chi}{V^2} = -\frac{\ln \varepsilon}{V^2} + \frac{1}{V} \frac{\partial \ln \varepsilon}{\partial V} = \frac{\partial}{\partial V} \left( \frac{\ln \varepsilon}{V} \right) \quad [\text{S15}]$$

Thus  $\chi$  may be expressed as:

$$\chi = -V^2 \frac{\partial}{\partial V} \left( \frac{\ln \varepsilon}{V} \right) \quad [\text{S16}]$$

$\chi_+$  and  $\chi_-$  values are the limiting values of the above expression, at very high and very low voltages respectively.

For a two-state process, the sum of measured probability of activation ( $P_A$ ) and measured probability of resting ( $P_R$ ) of a structural unit will always be unity. Thus the coupled equilibrium constant can be written as:

$$\varepsilon = \frac{P_A}{1 - P_A} \quad [\text{S17}]$$

Using Eqs. S16 and S17 we can easily arrive at Eq. 18.

1. Pantazis A, Gudzenko V, Savalli N, Sigg D, & Olcese R (2010) Operation of the voltage sensor of a human voltage- and Ca<sup>2+</sup>-activated K<sup>+</sup> channel. *Proc Natl Acad Sci USA* 107(9):4459–4464.

2. Horn RA & Johnson CR (1994) *Topics in Matrix Analysis* (Cambridge Univ Press, Cambridge).

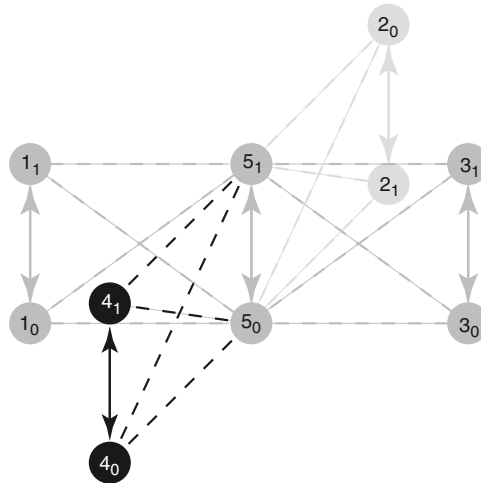

**Fig. S1.** Hypothetical model of a voltage-dependent sodium channel. The model represents a voltage-dependent sodium channel. Particles 1 through 4 represent the four nonidentical voltage-sensing domains of the ion channel, each capable of existing in two conformations: resting (designated as  $i_0$ ) and activated (designated as  $i_1$ ) ( $i = 1, 2, 3,$  or  $4$ ). The central pore domain, designated as particle 5, can also exist in two conformations: open ( $5_1$ ) or closed ( $5_0$ ). The vertical double-headed solid lines represent the intrinsic activation constants for the conformational change of the particles. The diagonal and horizontal lines represent the microstate dependent pairwise coupling factors between the particles: The diagonal lines indicate the cross-interactions between particles that are in unlike states, whereas the horizontal lines represent the like interactions between particles in the same microstate. Each of the voltage-sensing domains is directly coupled to the pore, but none of the voltage sensors interact with each other directly.
